# Supplementary material for: Geochemical zones and environmental gradients for soils from the central Transantarctic Mountains, Antarctica
Source: Copernicus journal article supplement (doi:10.5194/bg-18-1629-2021), 2021-03-09
Supplement: Supplementary file 1 [file bg-18-1629-2021-supplement.zip]

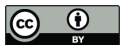

## *Supplement of*

# **Geochemical zones and environmental gradients for soils from the central Transantarctic Mountains, Antarctica**

**Melisa A. Diaz et al.**

*Correspondence to:* Melisa A. Diaz ([mdiaz@whoi.edu](mailto:mdiaz@whoi.edu))

- [bg-18-1629-2021-supplement-title-page.pdf](#)
- [mdiaz\\_ML\\_BGS\\_01-01-21\\_SI](#)
  - [MLR and RF code for publication\\_log.R](#)
  - [MLR\\_and\\_RF\\_code\\_for\\_publication\\_log.txt](#)
  - [Precision and accuracy.xlsx](#)
  - [RFSalts\\_Test.xlsx](#)
  - [RFSalts\\_Train.xlsx](#)
  - [Salts.xlsx](#)
  - [Shackleton ion concentrations.xlsx](#)
  - [mdiaz\\_ML\\_BGS\\_01-01-21\\_SI.pdf](#)

The copyright of individual parts of the supplement might differ from the CC BY 4.0 License.
