# Supplementary material for: Geochemical zones and environmental gradients for soils from the central Transantarctic Mountains, Antarctica
Source: Copernicus journal article supplement (doi:10.5194/bg-18-1629-2021), 2021-03-09
Supplement: Supplementary file 2 [file bg-18-1629-2021-supplement.zip]

# Geochemical zones and environmental gradients for soils from the Central Transantarctic Mountains, Antarctica

Melisa A. Diaz<sup>1,2†\*</sup>, Christopher B. Gardner<sup>1,2</sup>, Susan A. Welch<sup>1,2</sup>, W. Andrew Jackson<sup>3</sup>, Byron J. Adams<sup>4</sup>, Diana H. Wall<sup>5</sup>, Ian D. Hogg<sup>6,7</sup>, Noah Fierer<sup>8</sup>, W. Berry Lyons<sup>1,2</sup>

<sup>1</sup>School of Earth Sciences, The Ohio State University, Columbus, OH, USA

<sup>2</sup>Byrd Polar and Climate Research Center, The Ohio State University, Columbus, OH, USA

<sup>3</sup>Department of Civil, Environmental, & Construction Engineering, Texas Tech University, Lubbock, TX, USA

<sup>4</sup>Department of Biology, Evolutionary Ecology Laboratories, and Monte L. Bean Museum, Brigham Young University, Provo, UT, USA

<sup>5</sup>Department of Biology and School of Global Environmental Sustainability, Colorado State University, Fort Collins, CO, USA

<sup>6</sup>Canadian High Arctic Research Station, Polar Knowledge Canada, Cambridge Bay, Nunavut, Canada

<sup>7</sup>School of Science, University of Waikato, Hamilton, New Zealand

<sup>8</sup>Department of Ecology and Evolutionary Biology and Cooperative Institute for Research in Environmental Science, University of Colorado Boulder, Boulder, CO, USA

<sup>†</sup>Now at Departments of Geology and Geophysics and Applied Ocean Physics and Engineering, Woods Hole Oceanographic Institution, Woods Hole, MA, USA

*Correspondence to:* Melisa A. Diaz ([mdiaz@whoi.edu](mailto:mdiaz@whoi.edu))

21 **Supplementary materials:**

22

23 **Figure S1:** Images of black lichen (a), green lichen (b), collembola (c), and multiple lichen species (d) at Mt. Speed and Mt.  
24 Wasko.  
25

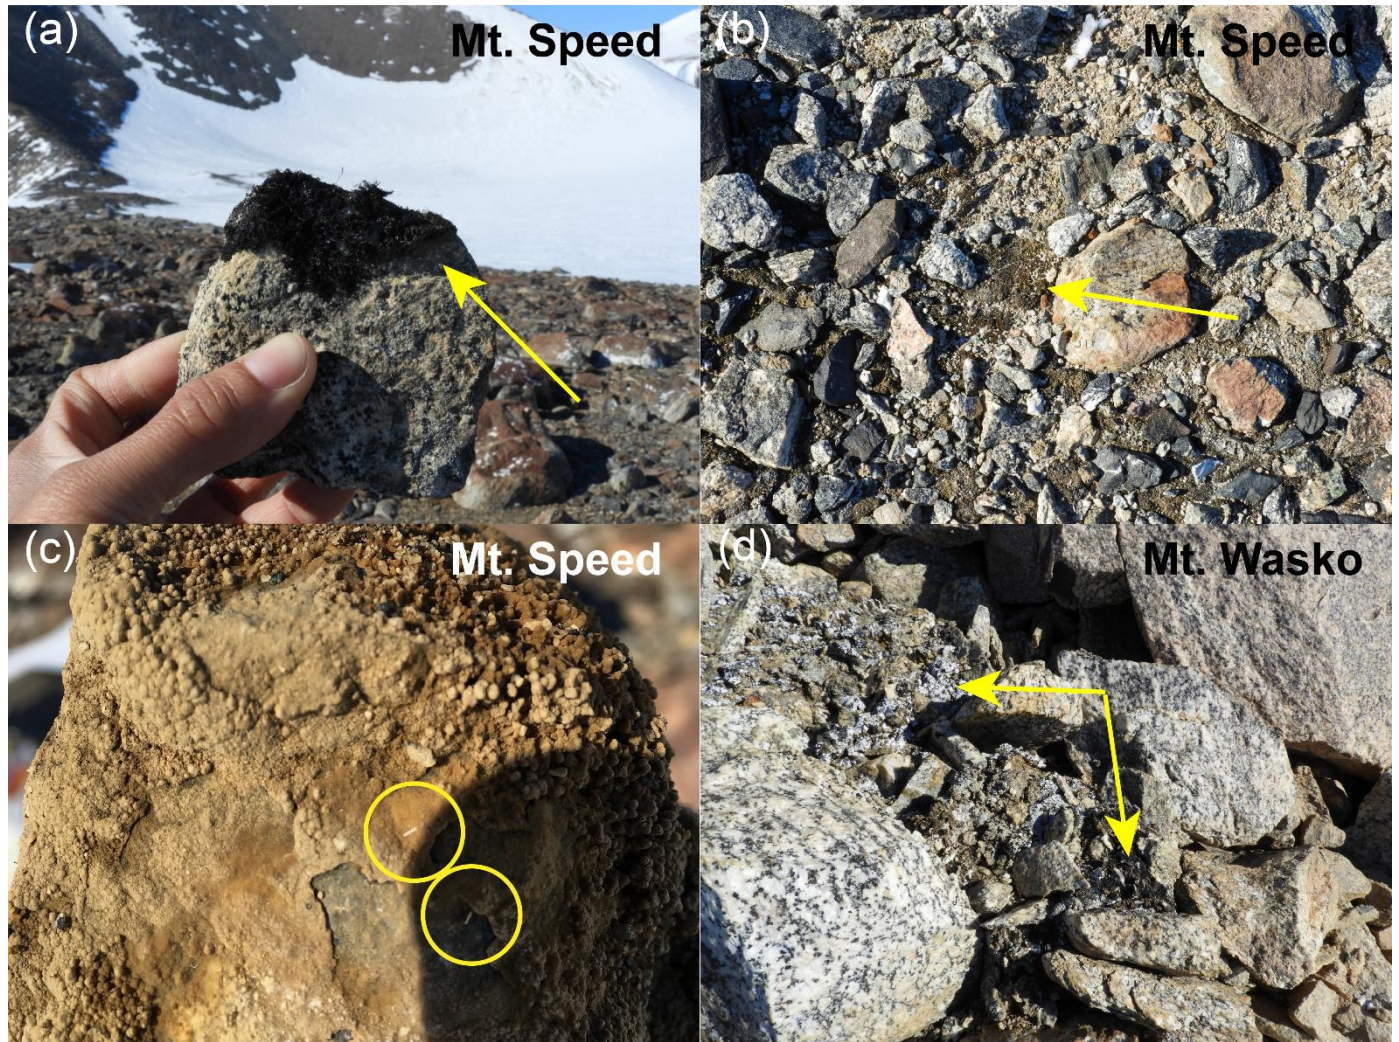

26

27 **Table S1:** Analytical precision and accuracy for water-soluble salts.

28

29 **Table S2:** Water-soluble ion concentrations from 1:5 soil to water leaches (Salts).

30

31 **Table S3:** Random forest model imputed training dataset (RFSalts\_Train).

32

33 **Table S4:** Random forest model imputed testing dataset (RFSalts\_Test).

34
